# Supplementary material for: Single-cell transcriptomics uncovers that cell-to-cell communication controls p53 activation
Source: Research Square preprint supplement (doi:10.21203/rs.3.rs-7101355/v1), 2025-07-22
Supplement: Supplementary file [file 637ae9495bad98c8b69b00fa.pdf]

**A**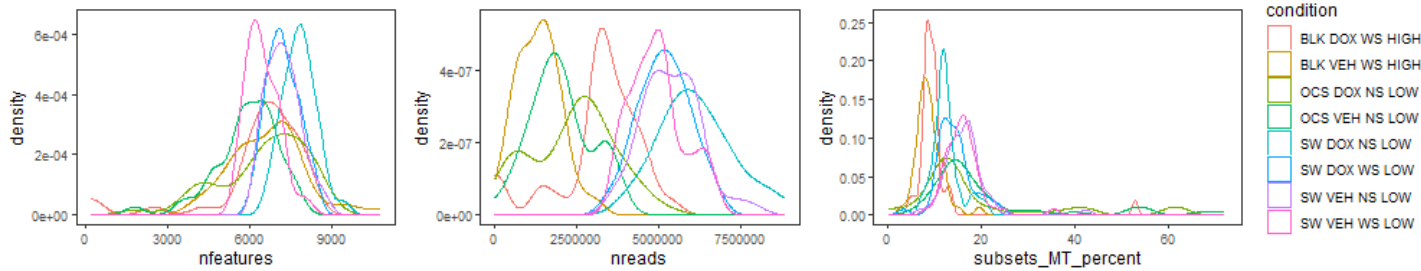**B**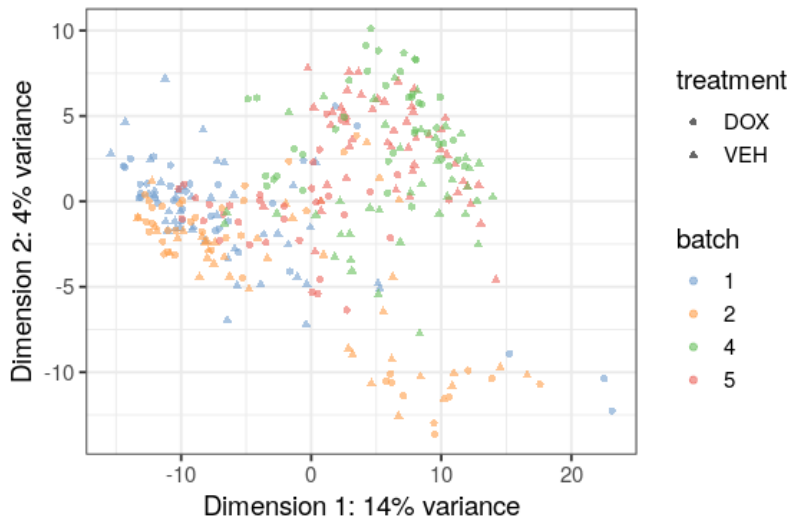**C**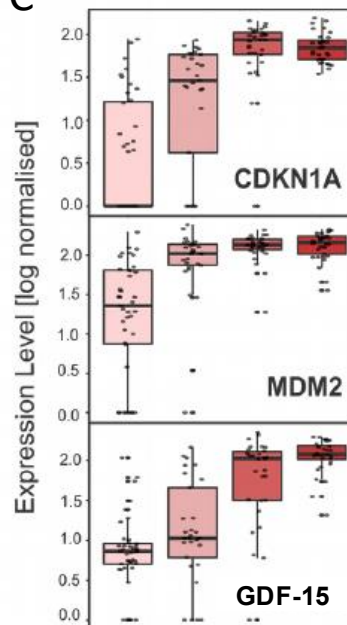

**Supplementary Figure 1. A)** Distribution of QC metrics for cells post-filtering. **B)** PCA of bulk-treated samples prior to batch correction demonstrates clustering by batch, not treatment condition. **C)** Key DNA-damage response genes including CDKN1A and MDM2 show expected pattern of up-regulation in response to dox treatment.

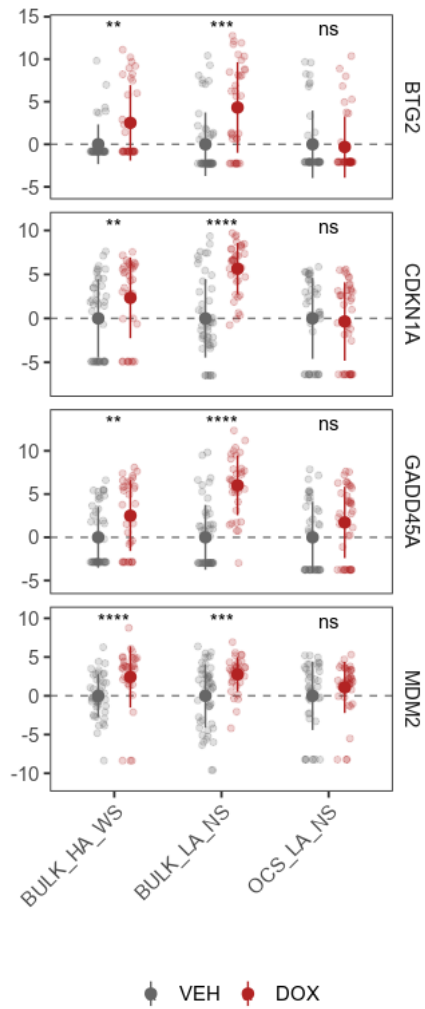

**Supplementary Figure 2.** Expression of key p53 response genes in bulk conditions (adherence with serum BULK\_HA\_WS, low adherence and no serum BULK\_LA\_NS) vs on-chip stimulation (low adherence and no serum OCS\_LA\_NS)

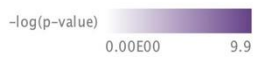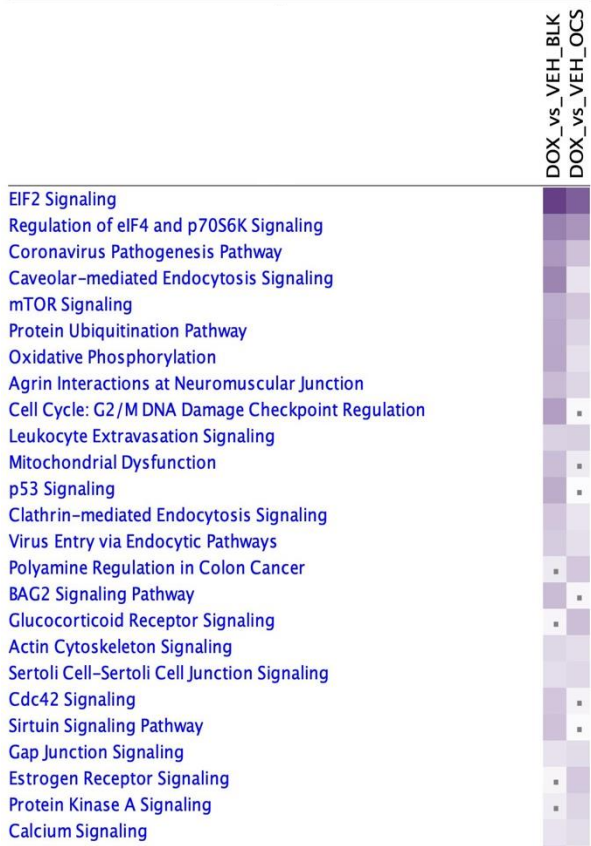

**Supplementary Figure 3.** Ingenuity Pathway Analysis (IPA) comparison analysis shows that DNA damage, mitochondrial dysfunction and p53 signalling are no longer enriched in on chip stimulation (OCS). Dots indicate the pathways that are below the  $-\log(p\text{-value})$  cutoff value of 1.3.
